# Supplementary material
Source: PubMed Central journal article supplement (PMC16213)
Supplement: pnas_97_7_3183__1.pdf [file pnas_97_7_3183__1.pdf]

**Supplementary material for the manuscript entitled:  
A model for auditory sensitivity provided by self-tuned critical  
oscillations of hair cells**

S. Camalet, T. Duke, F. Jülicher and J. Prost

**I. GENERIC BEHAVIOR AT A HOPF-BIFURCATION**

**A. Nonlinear relation between periodic stimulus and displacements**

We are interested in the response  $x(t)$  of a nonlinear system to a periodic stimulus force  $f(t)$ . If only one frequency  $\nu = \omega/2\pi$  is present we use the Fourier expansions

$$f(t) = \sum_{n=-\infty}^{\infty} f_n e^{in\omega t} \quad (1)$$

$$x(t) = \sum_{n=-\infty}^{\infty} x_n e^{in\omega t} \quad , \quad (2)$$

where the complex coefficients  $x_n$  and  $f_n$  obey  $x_n = x_{-n}^*$  and  $f_n = f_{-n}^*$ . This representation implies that we focus on the 1:1 limit cycle solution and ignore all transient relaxation phenomena [for a discussion of more complex responses of a forced Hopf bifurcation, see C. Baesens (1987) Ph.D. thesis, Universite Libre de Bruxelles]. We consider the class of systems for which the force at a given time depends in a nonlinear way on the history of the displacements  $x(t)$  alone; as we will discuss in section D more complex cases do not change the basic properties. In this situation, the relation between  $x$  and  $f$  can be expressed as a systematic expansion of the force amplitudes  $f_n$  in the amplitudes  $x_n$ :

$$f_k = F_{kl}^{(1)} x_l + F_{klm}^{(2)} x_l x_m + F_{klmn}^{(3)} x_l x_m x_n + O(x^4) \quad , \quad (3)$$

where the expansion coefficients  $F_{k,k_1,\dots,k_n}^{(n)}$  are symmetric with respect to permutations of the indices  $k_1..k_n$ . The limit cycle solutions are invariant with respect to translations in time  $t \rightarrow t + \Delta t$ . Under these transformations the amplitudes change as  $x_n \rightarrow x_n e^{in\omega\Delta t}$  and  $f_n \rightarrow f_n e^{in\omega\Delta t}$ . Inspection of Eq. (3) shows that the time translation symmetry allows only for those terms  $F_{k,k_1,\dots,k_n}^{(n)} x_{k_1} \dots x_{k_n}$  for which  $k = k_1 + \dots + k_n$ . For all other cases  $F_{k,k_1,\dots,k_n}^{(n)}$  must vanish which significantly restricts the number of terms.

**B. Hopf bifurcation**

The nonlinear system exhibits spontaneous oscillations and a Hopf-bifurcation if non-trivial solutions to Eq. (3) with  $x_n \neq 0$  exist in the case where all  $f_k = 0$ , i.e. if no stimulus force is applied. Without loss of generality, we consider here an instability of the mode  $x_1$ . In this case, the dominant terms allowed by symmetry read ( $f_k = 0$ )

$$0 \simeq F_{11}^{(1)}x_1 + 2F_{1,2,-1}^{(2)}x_{-1}x_2 + 6F_{1,1,1,-1}^{(3)}x_1^2x_{-1} + 6F_{1,1,2,-2}^{(3)}x_2x_{-2}x_1 \quad (4)$$

$$0 \simeq F_{22}^{(2)}x_2 + 2F_{211}^{(2)}x_1^2 \quad . \quad (5)$$

Eq. (5) determines  $x_2 \simeq -2(F_{211}^{(2)}/F_{22}^{(2)})x_1^2$ . Inserting this relation in Eq. (4), we obtain to lowest order

$$0 \simeq \mathcal{A}x_1 + \mathcal{B}|x_1|^2x_1 \quad , \quad (6)$$

where  $\mathcal{A} \equiv F_{11}^{(1)}$  and  $\mathcal{B} \equiv 3F_{1,1,1,-1}^{(3)} - 4F_{211}^{(2)}F_{1,2,-1}^{(2)}/F_{22}^{(2)}$ .

The coefficients  $\mathcal{A}(\omega, C)$  and  $\mathcal{B}(\omega, C)$  are complex and in general depend on frequency  $\omega$  and a control parameter which we denote by  $C$ . A Hopf bifurcation occurs at a critical point  $C = C_c$  at which  $\mathcal{A}$  vanishes for a frequency  $\omega_c$ , i.e.  $\mathcal{A}(\omega_c, C_c) = 0$ . This can be demonstrated as follows: A spontaneously oscillating solution satisfies

$$|x_1|^2 = -\frac{\mathcal{A}}{\mathcal{B}} \quad (7)$$

Note, that such a solution can only exist if  $\mathcal{A}/\mathcal{B}$  is real and negative. At the bifurcation point,  $\mathcal{A} = 0$  and  $\mathcal{A}/\mathcal{B}$  is therefore real for  $\omega = \omega_c$ , however the corresponding amplitude  $|x_1|^2$  vanishes. In the vicinity of this point we expect to find solutions with finite amplitude. We use the expansion

$$\mathcal{A}(\omega, C) \simeq (\omega - \omega_c)A_1 + (C - C_c)A_2 \quad (8)$$

where  $A_1$  and  $A_2$  are complex coefficients and we neglect higher order terms. Spontaneous oscillating solutions exist only if  $\mathcal{A}/\mathcal{B}$  is real. This condition is satisfied for a particular frequency  $\omega = \omega_s$  with

$$\omega_s = \omega_c + \frac{Im(A_2/\mathcal{B})}{Im(A_1/\mathcal{B})}(C_c - C) \quad . \quad (9)$$

The ratio  $-\mathcal{A}/\mathcal{B}$  at this frequency  $\omega_s$  changes sign for  $C = C_c$ ; here we assume without loss of generality that it is positive for  $C < C_c$ . In this case, the system oscillates spontaneously with an amplitude which according to Eq. (7) behaves as  $|x_1|^2 = \Delta^2(C_c - C)/C_c$ , where

$$\Delta^2 = C_c \left( Re(A_2/\mathcal{B}) - Re(A_1/\mathcal{B}) \frac{Im(A_2/\mathcal{B})}{Im(A_1/\mathcal{B})} \right) \quad (10)$$

is a typical amplitude. We have thus demonstrated that Eq. (6) characterizes a Hopf-bifurcation if the complex coefficient  $\mathcal{A}$  vanishes at a critical point  $C_c$  for a critical frequency  $\omega_c$ .

### C. Amplified response to sinusoidal stimuli

If a sinusoidal stimulus  $f(t) = f_1 e^{i\omega t} + f_{-1} e^{-i\omega t}$ , for which all  $f_n$  with  $n \neq \pm 1$  vanish, Eq. (6) becomes

$$f_1 \simeq \mathcal{A}x_1 + \mathcal{B}|x_1|^2x_1 \quad . \quad (11)$$

We consider a system that is tuned exactly to the bifurcation,  $C = C_c$ . In this situation spontaneous oscillations do not occur and  $\mathcal{A} = (\omega - \omega_c)A_1$ . If the imposed frequency is equal to the critical frequency  $\omega = \omega_c$ , the coefficient  $\mathcal{A}$  vanishes and we can solve Eq. (11) for  $|x_1|$  to find the nonlinear response

$$|x_1| \simeq |\mathcal{B}|^{-1/3}|f_1|^{1/3} \quad , \quad (12)$$

as a function of the force amplitude  $|f_1|$ . This behavior represents an amplified response with a gain

$$r = \frac{|x_1|}{|f_1|} \sim |f_1|^{-2/3} \quad (13)$$

that becomes arbitrarily large for small forces. If the frequency  $\omega$  is different from  $\omega_c$ , this nonlinear response still holds as long as the linear term in Eq. (11) is small compared to the cubic term and can be neglected. This is the case if  $|x_1|^2 \gg |\mathcal{A}/\mathcal{B}| = |\omega - \omega_c||A_1/\mathcal{B}|$ . Therefore, the nonlinear regime characterized by Eq. (12) holds for sufficiently large force amplitudes,  $|f_1| \gg |(\omega - \omega_c)A_1|^{3/2}/|\mathcal{B}|^{1/2}$ , or if the frequency is sufficiently close to the critical frequency,  $|\omega - \omega_c| \ll |f_1|^{2/3}|\mathcal{B}|^{1/3}/|A_1|$ .

If the frequency mismatch  $|\omega - \omega_c|$  becomes large, or if forces  $|f_1|$  are small, a new regime occurs for which the linear term in (11) dominates. In this regime, the response is linear,

$$|x_1| \simeq \frac{|f_1|}{|(\omega - \omega_c)A_1|} \quad , \quad (14)$$

and the gain is constant. This is a passive response if the stimulus frequency is too far from the critical frequency.

#### D. Additional remarks

The above derivation is based on an expansion (3) in the displacements  $x_n$ . This excludes some nonlinearities in the force which can lead to additional nonlinear terms in Eq. (11). The most general form of Eq. (11) is

$$f_1 \simeq \mathcal{A}x_1 + \mathcal{B}|x_1|^2x_1 + \mathcal{C}x_1|f_1|^2 + \mathcal{D}x_{-1}f_1^2 + \mathcal{E}|x_1|^2f_1 + \mathcal{F}x_1^2f_{-1} + \mathcal{G}|f_1|^2f_1 \quad . \quad (15)$$

However, for small forces  $f_1$  and small amplitudes  $x_1$ , the results derived above are not affected. The regime of nonlinear response  $|f_1| \sim |x_1|^3$ , as well as the linear response regime  $|f_1| \sim |x_1|$  still exist. If  $|f_1| \sim |x_1|$ , the nonlinear terms in  $f_1$  renormalize the third order term, which in this regime is negligible. If  $|f_1| \sim |x_1|^3$ , the nonlinear terms in  $f_1$  are of even higher order and can be neglected.

## II. OSCILLATIONS GENERATED BY MOLECULAR MOTORS

### A. Two state model

The two state model describes force-generation as a result of transitions between two states, a bound state and a detached state of a motor and its track filament. The interaction between a motor at position  $z$  along the filament in states 1 and 2 is characterized by two periodic potentials  $W_1(z) = W_1(z + l)$  and  $W_2(z) = W_2(z + l)$  where  $l$  is the period. We introduce the relative position  $\xi = z \bmod l$  with respect to the potential period. Detachment and attachment rates are denoted  $\omega_1(\xi)$  and  $\omega_2(\xi)$ , respectively. Oscillations can occur in this model if a large number  $N$  of motors move collectively against an external elastic element of modulus  $K$ .

We introduce the probability  $P_1(\xi)$  and  $P_2(\xi)$  of finding a motor bound at position  $\xi$  in state 1 or 2, which satisfy the normalization condition

$$\int_0^l d\xi (P_1 + P_2) = 1 \quad (16)$$

For a large number of motors collectively moving with the same velocity  $v$  the dynamic equations read

$$\partial_t P_1 + v \partial_\xi P_1 = -\omega_1 P_1 + \omega_2 P_2 \quad (17)$$

$$\partial_t P_2 + v \partial_\xi P_2 = \omega_1 P_1 - \omega_2 P_2 \quad (18)$$

The velocity  $v$  is determined by the force-balance condition

$$f = \lambda v + Kz + N \int_0^l d\xi (P_1 \partial_\xi W_1 + P_2 \partial_\xi W_2) \quad (19)$$

where  $\lambda$  is a friction coefficient describing the total friction and  $z$  is the displacement of the motors,  $\partial_t z = v$ . For an incommensurate arrangement of motors with respect to the track filament and a large number  $N$  of motors,  $P_1(\xi) + P_2(\xi) = 1/l$  and the equations of motions simplify:

$$\partial_t P_1 + v \partial_\xi P_1 = -(\omega_1 + \omega_2) P_1 + \omega_2 / l \quad (20)$$

We discuss a simple choice for the potentials and transition rates for which the Hopf bifurcation is easy to determine analytically. We consider the potential

$$W_1(\xi) = U \cos(2\pi\xi/l) \quad (21)$$

with amplitude  $U$ , and the potential  $W_2$  to be constant. The transition rates are chosen to be periodic functions

$$\omega_1(\xi) = \beta - \beta \cos(2\pi\xi/l) \quad (22)$$

$$\omega_2(\xi) = \alpha - \beta + \beta \cos(2\pi\xi/l) \quad (23)$$

parameterized by two coefficients  $\alpha$  and  $\beta$ . With this choice,

$$\omega_1(\xi) + \omega_2(\xi) = \alpha \quad (24)$$

is constant and the fact that  $\omega_1$  and  $\omega_2$  are positive restricts  $\beta$  to the interval  $0 \leq \beta \leq \alpha/2$ .

## B. Linear response function

In order to determine the linear coefficient  $\mathcal{A}$  which determines the stability of the system, we look for small amplitude oscillations close to the resting state with  $v = 0$ . We write

$$P \simeq p_0 + p_1 e^{i\omega t} \quad (25)$$

$$f \simeq f_1 e^{i\omega t} \quad (26)$$

$$z \simeq z_1 e^{i\omega t} \quad (27)$$

where  $p_0 = \omega_2/\alpha l$ . To linear order in  $z_1$ , we find from Eq. (20)

$$p_1 = -\frac{i\omega z_1}{i\omega + \alpha} \partial_x p_0 \quad (28)$$

The corresponding force is given by

$$f_1 \simeq \mathcal{A} z_1 \quad (29)$$

with

$$\mathcal{A} = i\omega\lambda + K + \chi \quad , \quad (30)$$

where the active response  $\chi$  of the motors is given by

$$\chi = -N \int_0^l d\xi \frac{i\omega}{i\omega + \alpha} \partial_\xi p_0 \partial_\xi W_1 \quad (31)$$

For the choice of Eq. (21) and (23) the integral can be calculated and we obtain

$$\mathcal{A}(C, \omega) = i\omega\lambda + K - Nk_0 C \frac{i\omega/\alpha + (\omega/\alpha)^2}{1 + (\omega/\alpha)^2} \quad . \quad (32)$$

Here, we have introduced the dimensionless control parameter  $C \equiv 2\pi^2\beta/\alpha$  with  $0 < C < \pi^2$  and the cross-bridge elasticity  $k_0 \equiv U/l^2$  of the motors.

## C. Hopf bifurcation

A Hopf bifurcation occurs if there is a pair of values  $(C, \omega)$  for which  $\mathcal{A}$  as given by Eq. (32) vanishes. Such a point indeed exists. For the critical value

$$C_c = \frac{\lambda\alpha + K}{Nk_0} \quad (33)$$

the bifurcation occurs for the critical frequency

$$\omega_c = \left( \frac{K\alpha}{\lambda} \right)^{1/2} \quad (34)$$

The critical frequency is bounded by the fact that  $C_c < \pi^2$ . The maximal frequency occurs for the maximal possible value of  $K$

$$K_{\max} = Nk_0\pi^2 - \lambda\alpha \quad (35)$$

for which  $C_c = \pi^2$ . This frequency is given by

$$\omega_{\max} = \alpha \left( N\pi^2 \frac{k_0}{\lambda\alpha} - 1 \right)^{1/2} \quad (36)$$

Note, that the maximal frequency can be significantly higher than the typical rate  $\alpha$  of the chemical cycle.
